1 **Genome reconstruction and characterisation of extensively drug-resistant bacterial**  
2 **pathogens through direct metagenomic sequencing of human faeces**

3

4 Andre Mu<sup>1,2,\*</sup>, Jason C. Kwong<sup>1,2,3,\*</sup>, Nicole S. Isles<sup>1</sup>, Anders Gonçalves da Silva<sup>1,2</sup>, Mark B.  
5 Schultz<sup>1,2</sup>, Susan A. Ballard<sup>1,2</sup>, Glen P. Carter<sup>2</sup>, Deborah A. Williamson<sup>1,2</sup>, Torsten Seemann<sup>2,4</sup>,  
6 Timothy P. Stinear<sup>#2</sup>, Benjamin P. Howden<sup>#1,2,3</sup>

7

8 <sup>1</sup>Microbiological Diagnostic Unit Public Health Laboratory, Department of Microbiology and  
9 Immunology at the Peter Doherty Institute for Infection and Immunity, University of  
10 Melbourne, Australia

11 <sup>2</sup>Doherty Applied Microbial Genomics, Department of Microbiology and Immunology at the  
12 Peter Doherty Institute for Infection and Immunity, University of Melbourne, Australia

13 <sup>3</sup>Department of Infectious Diseases, Austin Health, Australia

14 <sup>4</sup>Melbourne Bioinformatics, University of Melbourne, Australia

15

16 \*Authors contributed equally to the manuscript

17 # Authors contributed equally to the manuscript

18

19 **Correspondence:**

20 Professor Benjamin P. Howden

21 Director, Microbiological Diagnostic Unit Public Health Laboratory,

22 University of Melbourne at The Peter Doherty Institute for Infection and Immunity

23 Email: [bhowden@unimelb.edu.au](mailto:bhowden@unimelb.edu.au)

24

25

26

27

28 **Abstract**

29 Whole-genome sequencing of microbial pathogens is revolutionising modern approaches to  
30 outbreaks of infectious diseases and is reliant upon organism culture. Culture-independent  
31 methods have shown promise in identifying pathogens, but high level reconstruction of  
32 microbial genomes from microbiologically complex samples for more in-depth analyses  
33 remains a challenge. Here, using metagenomic sequencing of a human faecal sample and  
34 analysis by tetranucleotide frequency profiling projected onto emergent self-organising  
35 maps, we were able to reconstruct the underlying populations of two extensively-drug  
36 resistant pathogens, *Klebsiella pneumoniae* carbapenemase (KPC)-producing *Klebsiella*  
37 *pneumoniae* and vancomycin-resistant *Enterococcus faecium*. From these genomes, we were  
38 able to ascertain molecular typing results, such as MLST, and identify highly discriminatory  
39 mutations in the metagenome to distinguish closely related strains. These proof-of-principle  
40 results demonstrate the utility of clinical sample metagenomics to recover sequences of  
41 important drug-resistant bacteria and application of the approach in outbreak investigations,  
42 independent of the need to culture the organisms.

43  
44  
45  
46  
47  
48  
49  
50  
51  
52  
53  
54  
55  
56  
57  
58  
59

## 60 Introduction

61 Clinical and public health microbiology is undergoing a major transformation driven largely  
62 by high-throughput microbial genome sequencing. The application of microbial genomics in  
63 these areas has been well described, including use for high resolution microbial  
64 characterization, source and transmission tracking for nosocomial and community pathogens,  
65 and antimicrobial resistance detection and prediction<sup>1-4</sup>. Clinical and public health genomics,  
66 however, currently relies on routine culture-based assays to isolate pathogens of interest  
67 prior to whole genome sequencing, which presents inherent biases in analyses, and does not  
68 allow characterization of pathogens which are unculturable, below the level of culture  
69 detection, or unsuspected in a clinical sample<sup>5-9</sup>.

70  
71 Genomics-based approaches that overcome these difficulties by direct characterization of  
72 pathogens from clinical samples would be a major advance in clinical and public health  
73 microbiology. Metagenomics approaches can complement culture-based techniques for  
74 typing, and detecting, antimicrobial resistant (AMR) genes, and SNP variants<sup>10,11</sup>.  
75 Metagenomics allows for the sequencing of whole community genomic material extracted  
76 directly from clinical samples, such as faeces, blood, cerebrospinal fluid, sputum, and  
77 bronchoalveolar lavage fluid<sup>12,13</sup>. Current literature on public health metagenomics is largely  
78 based on interrogating the metagenome at ‘first-order’ level analyses; that is, either,  
79 characterizing bacterial biodiversity at the 16S rRNA gene level, identifying the functional  
80 profile of the microbial community, or alignment-based reference analyses for recovery of  
81 genomes<sup>12</sup>. However, the challenge still remains in applying alignment-free analyses of  
82 metagenomic data to obtain strain-level resolution that might help understand transmission  
83 of pathogens in a clinical setting. Recent metagenomics advances in the field of  
84 environmental microbiology and ecology may provide potential solutions here, including  
85 techniques that bin contigs based on their tetranucleotide frequency profiles (c.f.,<sup>14-17</sup>).

86  
87 In this proof-of-principle study, we used whole community metagenomics and pathogen  
88 genome reconstruction to interrogate the metagenome of a patient colonised with an  
89 extensively drug-resistant pathogen KPC-producing *K. pneumoniae*. Here we demonstrate  
90 that faeces metagenomics not only identified detailed SNP information to distinguish clonal  
91 *K. pneumoniae* isolates, but also uncovered unsuspected colonization with vancomycin-

92 resistant *Enterococcus faecium* (VREfm), another high-risk antimicrobial resistant pathogen.  
93 Furthermore, we investigated whether metagenomic analysis could be used to characterise  
94 the resistance-harboring genomes of a patient with long-term carriage of KPC-producing  
95 *Klebsiella pneumoniae*, and link that patient to a local transmission network, independently  
96 of the need for bacterial culture.  
97  
98

## 99 **Materials and Methods**

### 100 **Epidemiological context**

101 One faecal sample collected from a patient (Patient A) with known KPC-producing *K.*  
102 *pneumoniae* colonisation underwent whole community metagenomics. Patient A was a  
103 resident of an aged care facility and did not report any recent travel in the context of his  
104 comorbidities and frailty, but had been an inpatient at a tertiary hospital with a known  
105 outbreak of KPC-producing *K. pneumoniae* two months prior to sample collection.

106

### 107 **Whole community genomic DNA extraction and high throughput metagenomic sequencing**

108 Whole community gDNA was extracted from 0.2 grams of Patient faeces (herein referred to  
109 as AUSMDU00008155) using the QiaAMP Stool kit following manufacturer's protocol with a  
110 preprocessing step of mechanical lysis (Bertin Technologies precellys 24). MP Biomedicals'  
111 Lysing Matrix B 2-ml tubes containing 0.1 mm silica beads were used for two 40 second cycles  
112 of mechanical lysis (Bertin Technologies precellys 24) at 6000x units with a 60 second rest on  
113 ice in between. Genomic DNA from the faeces, and a no-template control, were processed  
114 for sequencing using the Nextera XT kit on the Illumina MiSeq machine (V3, 600 cycles)  
115 (Illumina Inc, San Diego, US) following a modified manufacturer's protocol. The following  
116 modifications were included: a 1% (v/v) spike-in ratio of PhiX, denatured DNA was diluted to  
117 a final concentration of 14.25 pM with pre-chilled HT1 buffer, and Tris-Cl 10 mM 0.1% Tween  
118 20 was substituted with Qiagen's EB solution to dilute sequencing libraries and PhiX  
119 throughout the protocol.

120

### 121 **Culture-dependent whole genome sequencing**

122 Concurrently, 14 individual colonies were picked at random from the same sample plated on  
123 Brilliance™ CRE selective media (Thermo Fisher Scientific, Waltham, US), with each colony  
124 undergoing whole-genome sequencing on the Illumina NextSeq 500 (Illumina Inc, San Diego,  
125 US). Two KPC isolates (herein referred to as AUSMDU00008118 and AUSMDU00008119)  
126 taken two days apart from a different patient that had previously undergone long-read  
127 sequencing to investigate the plasmid dynamics within an outbreak of KPC-producing  
128 *Klebsiella pneumoniae* were used as reference genomes for the analysis. DNA extraction, size  
129 selection, and sequencing on the Pacific Biosciences RS II (Pacific Biosciences, Menlo Park, US)  
130 were performed as previously described<sup>18</sup>. Genomic DNA from these isolates was also

131 sequenced on the Illumina NextSeq 500 for polishing to produce high quality closed genomes.

132

### 133 **Bioinformatic analyses**

#### 134 **Metagenomic sequence data processing**

135 Metagenomic data from AUSMDU00008155 were processed prior to analysis with  
136 Trimmomatic (v0.33)<sup>19</sup> for quality control and to remove adaptor sequences, PhiX  
137 contamination, and trace contaminants from Illumina preparation kits. Paired-end reads were  
138 merged and assembled using Iterative de Bruijn Graph De Novo Assembler for Uneven  
139 sequencing Depth (IDBA-UD)<sup>20</sup> compiled for long reads (i.e., 651 bp). Further quality control  
140 included removing host-derived gDNA using DeconSeq and the Human Genome Reference  
141 Sequence (build 38; GCA\_000001405.22) prior to downstream analyses.

142

#### 143 **Metagenomic binning**

144 To reconstruct isolate genomes from the gut microbial community, an emergent self-  
145 organizing map (ESOM) was used. Tetranucleotide frequencies were calculated for the  
146 assembled contigs using Perl scripts developed by Dick et al., (2009)<sup>16</sup> in preparation for  
147 analysis using ESOMs. The primary map structure was determined using in silico fragmented  
148 (> 5kb) contigs; while contigs between 2.5kb and 5kb in length were projected onto the ESOM  
149 using their tetranucleotide frequency profiles. Genomic binning was analysed using  
150 Databionic ESOM Tool with default settings except K-Batch training algorithm in 200x400  
151 windows, a starting value of 50 for the radius, and data points were normalized by RobustZT  
152 transformation. Contigs with a native size smaller than 2.5kb were removed from analyses.  
153 Reference genomes were included in the analysis to guide identification of “binned”  
154 genomes, and validate completeness of genome recovery.

155

#### 156 **Detection of antimicrobial resistance genes**

157 Assembled metagenomic contigs were screened for the presence of antimicrobial and  
158 virulence genes, including carbapenemases (*bla<sub>KPC</sub>*), using ABRicate  
159 (<https://github.com/tseemann/abricate>). Briefly, ABRicate detects acquired resistance genes  
160 using BLAST+ against the Resfinder database (Center for Genomic Epidemiology, University  
161 of Denmark<sup>21</sup>).

162

### 163 ***In silico* molecular typing and detection of antimicrobial resistance genes**

164 Assembled metagenomic contigs were screened for multi-locus sequence typing (MLST)  
165 scheme alleles using mlst (<https://github.com/tseemann/mlst>), an in-house tool that uses a  
166 BLAST algorithm <sup>22</sup> to search against the entire reference database of MLST profiles  
167 (downloaded from <https://pubmlst.org>). In addition, acquired antimicrobial resistance genes,  
168 including carbapenemases (blaKPC), were detected using another custom BLAST tool,  
169 ABRicate (<https://github.com/tseemann/abricate>), to search against the ResFinder v2.1  
170 database <sup>21</sup>

171

### 172 **Reconstructing 16S rRNA gene sequences**

173 Near-complete 16S rRNA gene sequences were reconstructed from Patient B unassembled  
174 short read metagenomic data (post removal of host-derived gDNA) using the Expectation  
175 Maximization Iterative Reconstruction of Genes from the Environment (EMIRGE) program <sup>23</sup>.  
176 The following parameters were incorporated: the SILVA Small Subunit database was  
177 employed as a training reference set, length of reads of 151, insert size of 683, standard  
178 deviation of 68, and a phred score of 33 were selected to compute over 80 iterations.  
179 Reconstructed 16S rRNA genes were queried against the Ribosomal Database Project using  
180 BLAST. A k-mer based approach, using Kraken <sup>24</sup>, classified unassembled read data to support  
181 EMIRGE results.

182

### 183 **Reference genome assembly to validate metagenomic bins**

184 Reference genomes were assembled using Canu v1.5<sup>25</sup>, trimmed  
185 (<https://github.com/tseemann/berokka>) and circularized. Illumina short read data from the  
186 same gDNA sample were used to correct and polish the draft PacBio genomes using Pilon  
187 v1.22 <sup>26</sup> and Snippy v3.2 (<https://github.com/tseemann/snippy>). Further assembly of  
188 unmapped short read data (i.e., Illumina reads that did not match chromosomal or larger  
189 plasmid DNA from PacBio-derived data) using SPAdes v3.10.1 <sup>27</sup> ) was used to detect the  
190 presence smaller plasmids potentially missed through DNA size selection. Prokka v1.11 <sup>28</sup> was  
191 used to predict CDS regions and annotate the assembled genomes. Further characterisation  
192 of reference genomes including multi-locus sequence typing and antimicrobial resistance  
193 gene detection was performed in silico using the in-house developed tools, mlst and ABRicate  
194 as described above.

195 **Transmission cluster inference**

196 To determine the most likely transmission cluster source for Patient A, previously sequenced  
197 PacBio reference genomes from three local transmission clusters were assembled using the  
198 methods described above, and used to build a custom Kraken database. The local  
199 transmission clusters were defined through phylogenetic analysis of a maximum likelihood  
200 tree described in Kwong *et al.*, (*in prep*). Whole-community metagenomic sequencing reads  
201 were analysed in Kraken v0.10.5-beta<sup>24</sup> using the custom database to identify the most  
202 closely related reference genome.

203

204



## 205 **Results**

### 206 ***In silico* typing and detection of AMR genes**

207 Analysis of the assembled metagenomic contigs from Patient A identified the presence of two  
208 complete mlst profiles – ST258 *K. pneumoniae* and ST555 *E. faecium*. Table 1 highlights the  
209 resistance AMR genes detected with 100% coverage. The gene encoding resistance to  
210 carbapenem, *bla<sub>KPC</sub>*, was detected at 100% coverage and nucleotide identity. The following  
211 genes, with percentage coverage and nucleotide identity given in parentheses, were also  
212 recovered from metagenomic data: *vanR-B* (100, 99.2), *vanS-B* (100, 99.6), *vanY-B* (100, 100),  
213 *vanW-B* (100, 97.6), *vanH-B* (100, 99.4), *van-B* (100, 98.9), and *vanX-B* (100, 96.7), which  
214 collectively is the vanB operon that encodes for vancomycin resistance in *Enterococcus*  
215 *faecium*; while the vanB operon primarily encodes for antibiotic resistance in *E. faecium*,  
216 Stinear et al., (292001) have previously isolated vanB-positive anaerobic commensal bacteria  
217 from human faeces. We hence reconstructed near-full length 16S rRNA genes to assign  
218 taxonomy of operational taxonomic units in our metagenome.

219

### 220 **Taxonomy of metagenomic reads**

221 Near-full length 16S rRNA genes were reconstructed from the gut microbial community of  
222 AUSMDU00008155 to detect the presence of *K. pneumoniae* and *E. faecium*. The Expectation  
223 Maximization Iterative Reconstruction of Genes from the Environment program  
224 reconstructed fifteen 16S rRNA genes, in which a *K. pneumoniae* 16S rRNA gene was  
225 recovered with 100% nucleotide identity over 1161 bp (Table 2). Notably, given the presence  
226 of the *vanB* operon, a near-complete 16S rRNA gene at 1344 bp was reconstructed and  
227 classified as *E. faecium* at 100% nucleotide identity. Three uncultured organisms were  
228 identified as belonging to *Bacteroidetes/Bacteroides*, *Firmicutes/Clostridium* XIVa, and  
229 *Proteobacteria/Sutterellaceae*, with 100% nucleotide identity, and over 1092 bp  
230 reconstructed. An independent k-mer based approach (*i.e.*, Kraken) confirmed the presence  
231 of *K. pneumoniae*, and *E. faecium* in AUSMDU00008155 metagenomic data.

232

### 233 **Reconstruction of isolate genomes from metagenomic reads**

234 Emergent Self Organizing Maps of the tetranucleotide frequencies of AUSMDU00008155-  
235 derived metagenomic contigs reconstructed discrete genome “bins” of isolates from the gut  
236 microbial community (Figure 1A). Each point projected onto the ESOM represents DNA

237 fragments 2-5 kb in length, and colour coded with the following convention:  
238 AUSMDU00008155 microbiome in red, AUSMDU00008118 in teal, AUSMDU00008119 in  
239 navy, and an *E. faecium* AUS0085 strain in purple. A distinct *E. faecium* bin, and a largely  
240 mixed bin consisting of closely related AUSMDU00008118 and AUSMDU00008119 derived  
241 contigs were resolved (Figure 1B). Furthermore, a “satellite” cluster to the *K. pneumoniae* bin  
242 consisted of only AUSMDU00008155 and AUSMDU00008119 contigs, and is typically  
243 indicative of mobile genetic elements, such as, plasmids (Figure 1B, *circled*).

244

#### 245 **Inference of transmission**

246 Using a custom Kraken database, we determined that Patient A’s colonising ST258 *K.*  
247 *pneumoniae* population were most closely related to the reference genome from  
248 transmission cluster 2 (AUSMDU00008119), suggesting Patient A was most likely linked to this  
249 transmission network (Figure 2). Of the local reference genomes (Kwong *et al.*, *in prep*),  
250 AUSMDU00008119 had 136 reads assigned, compared to 11 and 9 reads for the other cluster  
251 references. This was corroborated by phylogenetic analysis of the multiple individual colony  
252 sequences derived from Patient A’s sample (Kwong *et al.*, *in prep*). These data demonstrate  
253 the potential of clinical metagenomics to guide source tracking and infection control efforts.

254

255

## 256 Discussion

257 Previous clinical metagenomic analyses have focused on understanding gut microbiota  
258 community diversity 16S rRNA gene level, or incorporating *in vitro* molecular diagnostics as  
259 the primary analysis to identify pathogenic isolates <sup>12,30-32</sup>. In contrast, in this proof-of-  
260 principle clinical study, we employed tetranucleotide frequency profiling as the main strategy  
261 to reconstruct genomes of community members directly from a faecal specimen, and  
262 determine the presence of KPC with strain-level resolution, as well as identifying previously  
263 unrecognized colonization with *vanB* VRE. Tetranucleotide profiles (i.e., frequencies of the  
264 256 combinations of G,A,T, and C, in each contig) are a fundamental characteristic of DNA.  
265 Contigs with similar tetranucleotide profiles are derived from the same isolate, and therefore,  
266 projection of the frequency profiles of metagenomic contigs onto ESOMs can reconstruct  
267 isolate genomes independently of reference-based alignment approaches, such as BLAST  
268 and/or BWA MEM; this highlights the potential to allow strain level molecular  
269 characterization even when a reference isolate is not available *a priori* (c.f., <sup>33-34</sup>. The fact that  
270 this was achievable using a faeces sample further speaks to the validity of this approach, given  
271 the microbial complexity of this sample type.

272  
273 Metagenomics permitted the comprehensive sampling of genomic content from an adult gut  
274 microbial community associated with KPC infection. We evaluated the AMR profile, and  
275 detected *bla<sub>KPC</sub>* at 100% coverage with zero gaps, and 100% nucleotide identity (Table 1)  
276 which encodes for carbapenem resistance in *Klebsiella pneumoniae*. Furthermore, the  
277 resolution of our analyses detected the presence of the genes encoding for an entire *vanB*  
278 operon, which confers vancomycin resistance in *E. faecium* isolates, at 100% coverage with  
279 zero gaps, and greater than 96% nucleotide identity (Table 1). Reconstruction of near full  
280 length 16S rRNA genes from metagenomic short read data recovered an 1161 bp 16S rRNA  
281 gene classified as *K. pneumoniae*, and 1344 bp 16S rRNA gene belonging to an *E. faecium*  
282 isolate, with 100% nucleotide identity and coverage (Table 2). Our metagenomic analyses  
283 uncovered VRE colonization in AUSMDU00008155, and initiated culture analysis of the faecal  
284 sample for the presence of VRE using selective media, and a retrospective report notifying  
285 the appropriate health care institution of a potential VRE carrier; a reporting that would  
286 otherwise have been missed by routine diagnostic analyses. Asymptomatic VRE carriage in  
287 AUSMDU00008155 may be facilitated by the co-occurrence of *C. bolteae* in the microbiome,

288 which is described to confer protection against VRE by Carballero *et al.*, (<sup>30</sup>2017); this  
289 underscores the important roles microbial community members play in regulating infection  
290 and immunity, and suggests whole community metagenomics could become a core  
291 component of clinical microbiology.

292

293 Tetranucleotide frequency-ESOM analysis recovered metagenomic bins representing single  
294 isolates from the AUSMDU00008155 gut microbiome (Figure 1A). Encouragingly, we found  
295 that the number of reconstructed genomes (i.e., “bins”) correlated with the number of 16S  
296 rRNA genes recovered by our EMIRGE analysis. As a way of further validation, reference *E.*  
297 *faecium* (Aus0085), and AUSMDU00008118 and AUSMDU00008119 genomes were included  
298 to guide analysis of ESOMs. Figure 1B illustrates a distinct *vanB*-carrying *E. faecium* bin, and a  
299 large *K. pneumoniae* bin with an associated “satellite” cluster. The main *K. pneumoniae* bin  
300 consisted of both AUSMDU00008118 and AUSMDU00008119 derived contigs, while the  
301 satellite cluster represents unique genomic content (most probably mobile genetic elements;  
302 c.f., <sup>16</sup>) from AUSMDU00008119, and is therefore indicative of strain-level discrimination.  
303 Although we have only assessed one faecal specimen in this study, the richness of microbial  
304 characterization obtained from this sample using an alignment-free approach shows the  
305 potential for applications in clinical and diagnostic microbiology. This potential is particularly  
306 evident for clonal pathogens such as those examined here, where MLST results were unable  
307 to distinguish between AUSMDU00008118, AUSMDU00008119, and metagenomic reads (i.e.,  
308 all isolates were ST258). For example, we accurately assigned Patient A’s colonising  
309 metagenomic *K. pneumoniae* isolate to a specific hospital infection cluster (Kwong *et al.*, *in*  
310 *prep*). Our ability to rapidly assign patient metagenomic isolates to pre-existing transmission  
311 clusters identified during outbreak situations will better inform prevention control measures  
312 to limit the spread of extensively drug-resistant pathogens across our hospital network.

313

314 In summary, the current study presents a clinical, and primarily culture-independent  
315 investigation framework for the genomic profiling of patients colonised with multidrug-  
316 resistant pathogens. Analysis of the whole community metagenome sampled from an adult  
317 faecal sample revealed the presence of AMR genes conferring resistance to carbapenem and  
318 vancomycin, and identification of pathogenic isolates. We have shown that metagenomic  
319 binning, using tetranucleotide frequency profiles, can obtain strain-level resolution. A key

320 implication of incorporating metagenomics into routine clinical microbiology includes higher  
321 resolution in AMR and pathogen detection, especially the detection of asymptomatic carriage  
322 of antibiotic resistant microbes.

323

#### 324 **Acknowledgements**

325 The Microbiological Diagnostic Unit Public Health Laboratory is funded by the Victorian  
326 Government. The Doherty Applied Microbial Genomics Program is funded by the Department  
327 of Microbiology and Immunology at the Peter Doherty Institute for Infection and Immunity,  
328 University of Melbourne. This research was supported by grants from the Austin Medical  
329 Research Foundation and the CASS Foundation (Ref No. 7113). JCK (GNT1074824), TPS  
330 (GNT1008549) and BPH (GNT1105905) are supported by the National Health and Medical  
331 Research Council of Australia.

332

333

## 334 References

- 335 1. Williamson, D. A., Howden, B. P. & Stinear, T. P. *Mycobacterium chimaera*  
336 spread from heating and cooling units in heart surgery. *N Engl J Med* **376**, 600–  
337 602 (2017).
- 338 2. Zozaya-Vald s, E. *et al.* Target-specific assay for rapid and quantitative detection  
339 of *Mycobacterium chimaera* DNA. *J. Clin. Microbiol.* **55**, 1847–1856 (2017).
- 340 3. Phillips, A. *et al.* Whole genome sequencing of *Salmonella* Typhimurium  
341 illuminates distinct outbreaks caused by an endemic multi-locus variable  
342 number tandem repeat analysis type in Australia, 2014. *BMC Microbiology* 1–9  
343 (2016). doi:10.1186/s12866-016-0831-3
- 344 4. Bakker, den, H. C. *et al.* Rapid Whole-Genome Sequencing for Surveillance of  
345 *Salmonella enterica* Serovar Enteritidis. *Emerg. Infect. Dis.* **20**, 1306–1314  
346 (2014).
- 347 5. Staley, J. T. Measurement of *in situ* activities of nonphotosynthetic  
348 microorganisms in aquatic and terrestrial habitats. *Annual Review of*  
349 *Microbiology* **39**, 321–346 (1985).
- 350 6. Dreier, J. *et al.* Culture-negative infectious endocarditis caused by *Bartonella*  
351 spp.: 2 case reports and a review of the literature. *Diagnostic Microbiology and*  
352 *Infectious Disease* **61**, 476–483 (2008).
- 353 7. Richardson, D. C. *et al.* *Tropheryma whippelii* as a cause of afebrile culture-  
354 negative endocarditis: the evolving spectrum of Whipple's disease. *Journal of*  
355 *Infection* **47**, 170–173 (2003).
- 356 8. Nakamura, S. *et al.* Metagenomic Diagnosis of Bacterial Infections. *Emerg.*  
357 *Infect. Dis.* **14**, 1784–1786 (2008).
- 358 9. Pallen, M. J., Loman, N. J. & Penn, C. W. High-throughput sequencing and  
359 clinical microbiology: progress, opportunities and challenges. *Current Opinion in*  
360 *Microbiology* **13**, 625–631 (2010).
- 361 10. Miller, R. R., Montoya, V., Gardy, J. L., Patrick, D. M. & Tang, P. Metagenomics  
362 for pathogen detection in public health. *Genome Medicine* **5**, 1–114 (2013).
- 363 11. Mulcahy-O Grady, H. & Workentine, M. L. The Challenge and Potential of  
364 Metagenomics in the Clinic. *Front. Immunol.* **7**, 260 (2016).
- 365 12. Loman, N. J. *et al.* A Culture-Independent Sequence-Based Metagenomics  
366 Approach to the Investigation of an Outbreak of Shiga-Toxigenic *Escherichia coli*  
367 O104:H4. *JAMA* **309**, 1–9 (2013).
- 368 13. Lim, Y. W. *et al.* Clinical Insights from Metagenomic Analysis of Sputum Samples  
369 from Patients with Cystic Fibrosis. *J. Clin. Microbiol.* **52**, 425–437 (2014).
- 370 14. Freedman, A. J. E., Tan, B. & Thompson, J. R. Microbial potential for carbon and  
371 nutrient cycling in a geogenic supercritical carbon dioxide reservoir.  
372 *Environmental Microbiology* **31**, 533 (2017).
- 373 15. Wrighton, K. C. *et al.* Fermentation, hydrogen, and sulfur metabolism in  
374 multiple uncultivated bacterial phyla. *Science* **337**, 1661–1665 (2012).
- 375 16. Dick, G. J. *et al.* Community-wide analysis of microbial genome sequence  
376 signatures. *Genome Biology* **10**, R85 (2009).
- 377 17. Hug, L. A. *et al.* A new view of the tree of life. *Nature Microbiology* **1**, 1–6  
378 (2016).
- 379 18. Carter, G. P. *et al.* Emergence of endemic MLST non-typeable vancomycin-  
380 resistant *Enterococcus faecium*. *Journal of Antimicrobial Chemotherapy* **71**,

- 381 3367–3371 (2016).
- 382 19. Bolger, A. M., Lohse, M. & Usadel, B. Trimmomatic: a flexible trimmer for  
383 Illumina sequence data. *Bioinformatics* **30**, 2114–2120 (2014).
- 384 20. Peng, Y., Leung, C. M. H., Yui, S. M. & Chin, Y. L. F. IDBA-UD: A de Novo  
385 Assembler for Single-Cell and Metagenomic Sequencing Data with Highly  
386 Uneven Depth. *Bioinformatics* **11**, 1420–1428 (2012).
- 387 21. Zankari, E. *et al.* Identification of acquired antimicrobial resistance genes.  
388 *Journal of Antimicrobial Chemotherapy* **67**, 2640–2644 (2012).
- 389 22. Altschul, S. F., Gish, W., Miller, W., Myers, E. W. & Lipman, D. Basic Local  
390 Alignment Search Tool. *Journal of Molecular biology* **215**, 403–410 (1990).
- 391 23. Miller, C. S., Baker, B. J., Thomas, B. C., Singer, S. W. & Banfield, J. F. EMIRGE:  
392 reconstruction of full-length ribosomal genes from microbial community short  
393 readsequencing data. *Genome Biology* **12**, 1–14 (2011).
- 394 24. Wood, D. E. & Salzberg, S. L. Kraken: ultrafast metagenomic sequence  
395 classification using exact alignments. *Genome Biology* **15**, 1–12 (2014).
- 396 25. Koren, S. *et al.* Canu: scalable and accurate long-read assembly via adaptive k-  
397 mer weighting and repeat separation. *Genome Research* **27**, 722–736 (2017).
- 398 26. Walker, B. J. *et al.* Pilon: An Integrated Tool for Comprehensive Microbial  
399 Variant Detection and Genome Assembly Improvement. *PLoS ONE* **9**, e112963  
400 (2014).
- 401 27. Bankevich, A. *et al.* SPAdes: A New Genome Assembly Algorithm and Its  
402 Applications to Single-Cell Sequencing. *Journal of Computational Biology* **19**,  
403 455–477 (2012).
- 404 28. Seemann, T. Prokka: rapid prokaryotic genome annotation. *Bioinformatics* **30**,  
405 2068–2069 (2014).
- 406 29. Stinear, T. P., Olden, D. C., Johnson, P. D. R., Davies, J. K. & Grayson, M. L.  
407 Enterococcal *vanB* resistance locus in anaerobic bacteria in human faeces. *The*  
408 *lancet* **357**, 855–856 (2001).
- 409 30. Caballero, S. *et al.* Cooperating Commensals Restore Colonization Resistance to  
410 Vancomycin-Resistant *Enterococcus faecium*. *Cell Host and Microbe* **21**, 592–  
411 602.e4 (2017).
- 412 31. Zhou, Y. *et al.* Metagenomic Approach for Identification of the Pathogens  
413 Associated with Diarrhea in Stool Specimens. *J. Clin. Microbiol.* **54**, 368–375  
414 (2016).
- 415 32. Yu, H.-J. *et al.* International Journal of Infectious Diseases. *International Journal*  
416 *of Infectious Diseases* **53**, 30–33 (2016).
- 417 33. Sharon, I. *et al.* Time series community genomics analysis reveals rapid shifts in  
418 bacterial species, strains, and phage during infant gut colonization. *Genome*  
419 *Research* **23**, 111–120 (2013).
- 420 34. Morowitz, M. J. *et al.* Strain-resolved community genomic analysis of gut  
421 microbial colonization in a premature infant. *Proceedings of the National*  
422 *Academy of Sciences* **108**, 1128–1133 (2011).
- 423
- 424
- 425
- 426

## 427 **Figures and Tables**

428 **Table 1: Detection of antimicrobial resistance genes in AUSMDU00008155 metagenome**  
 429 **using ABRicate**

| Contig               | Start | End   | Gene                      | Gaps | % Coverage | % Identity | Accession       |
|----------------------|-------|-------|---------------------------|------|------------|------------|-----------------|
| FM_4827 <sup>#</sup> | 2150  | 3076  | <i>sul1_2</i>             | 0    | 100        | 100        | CP002151        |
| FM_1035              | 10808 | 11689 | <i>blaAUSMDU0008119_1</i> | 0    | 100        | 100        | AY034847        |
| FM_1074              | 7275  | 8135  | <i>blaSHV-12_1</i>        | 0    | 100        | 100        | AF462395        |
| FM_10044             | 186   | 1001  | <i>aph(3')-Ia_1</i>       | 0    | 100        | 100        | V00359          |
| FM_452               | 22060 | 22866 | <i>VanY-B_1</i>           | 0    | 100        | 100        | AF192329        |
| FM_784               | 15763 | 16260 | <i>dfrG_1</i>             | 0    | 100        | 100        | AB205645        |
| FM_313               | 6894  | 10046 | <i>oqxB_1</i>             | 0    | 100        | 100        | EU370913        |
| FM_313               | 10070 | 11245 | <i>oqxA_1</i>             | 0    | 100        | 100        | EU370913        |
| FM_2352              | 2933  | 4853  | <i>tet(W)_4</i>           | 0    | 100        | 99.9       | AJ427422        |
| FM_10870             | 34    | 873   | <i>blaOXA-9_2</i>         | 0    | 100        | 99.9       | JF703130        |
| FM_9051              | 161   | 1381  | <i>tet(40)_1</i>          | 0    | 100        | 99.8       | FJ158002        |
| FM_7453              | 1068  | 1565  | <i>dfrA12_1</i>           | 0    | 100        | 99.8       | AB571791        |
| FM_12072             | 99    | 965   | <i>aadE_1</i>             | 0    | 100        | 99.8       | KF864551        |
| FM_452               | 20546 | 21889 | <i>VanS-B_1</i>           | 0    | 100        | 99.6       | AF192329        |
| FM_452               | 23708 | 24679 | <i>VanH-B_1</i>           | 0    | 100        | 99.4       | AF192329        |
| FM_452               | 19884 | 20546 | <i>VanR-B_1</i>           | 0    | 100        | 99.2       | AF192329        |
| FM_452               | 24672 | 25700 | <i>VanA-B_1</i>           | 0    | 100        | 98.9       | AF192329        |
| FM_137               | 6369  | 7847  | <i>msr(C)_1</i>           | 0    | 100        | 98.9       | AY004350        |
| FM_255               | 25338 | 25757 | <i>fosA_3</i>             | 0    | 100        | 98.6       | NZ_ACWO01000079 |
| FM_452               | 22884 | 23711 | <i>VanW-B_1</i>           | 0    | 100        | 97.6       | AF192329        |
| FM_452               | 25706 | 26314 | <i>VanX-B_1</i>           | 0    | 100        | 96.7       | AF192329        |

430 <sup>#</sup>FM\_xxxxx = AUSMDU00008155 and the associated metagenomic contig number

431

432

433

434

435

436

437



438 **Table 2: Reconstructed 16S rRNA genes from AUSMDU00008155 metagenome using**  
 439 **EMIRGE**

| Taxon                                   | Subject length (bp) | Query length (bp) | Nucleotide ID | % Identity |
|-----------------------------------------|---------------------|-------------------|---------------|------------|
| <i>Akkermansia Muciniphila</i>          | 1434                | 1500              | 1431          | 99.8       |
| <i>Bacteroides cellulosilyticus</i>     | 1193                | 1202              | 1183          | 99.2       |
| <i>Bacteroides uniformis</i>            | 1145                | 1145              | 1143          | 99.8       |
| <i>Bacteroides uniformis</i>            | 680                 | 680               | 676           | 99.4       |
| <i>Clostridium bolteae</i>              | 1309                | 1309              | 1305          | 99.7       |
| <i>Clostridium glycyrrhizinilyticum</i> | 1268                | 1266              | 1231          | 97.1       |
| <i>Dialister invisus</i>                | 1290                | 1302              | 1287          | 99.8       |
| <i>Enterococcus faecium</i>             | 1344                | 1344              | 1344          | 100        |
| <i>Eubacterium dolichum</i>             | 1484                | 1516              | 1381          | 93.1       |
| <i>Klebsiella pneumoniae</i>            | 1161                | 1161              | 1161          | 100        |
| <i>Lactobacillus pentosus</i>           | 1468                | 1468              | 1467          | 99.9       |
| <i>Parabacteroides merdae</i>           | 1376                | 1376              | 1376          | 100        |
| Uncultured bacterium <sup>a</sup>       | 1092                | 1092              | 1092          | 100        |
| Uncultured organism <sup>b</sup>        | 1121                | 1121              | 1121          | 100        |
| Uncultured organism <sup>c</sup>        | 1191                | 1191              | 1191          | 100        |

440 <sup>a</sup>*Bacteroidetes/Bacteroides*

441 <sup>b</sup>*Firmicutes/Clostridium XIVa*

442 <sup>c</sup>*Proteobacteria/Sutterellaceae*

443

444 **Figures:**

445 **Figure. 1**

446 **A**

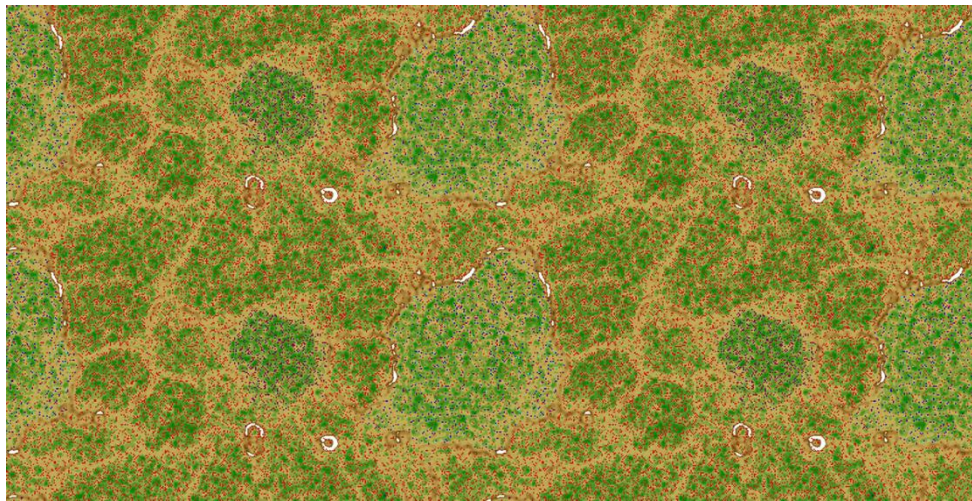

455 **B**

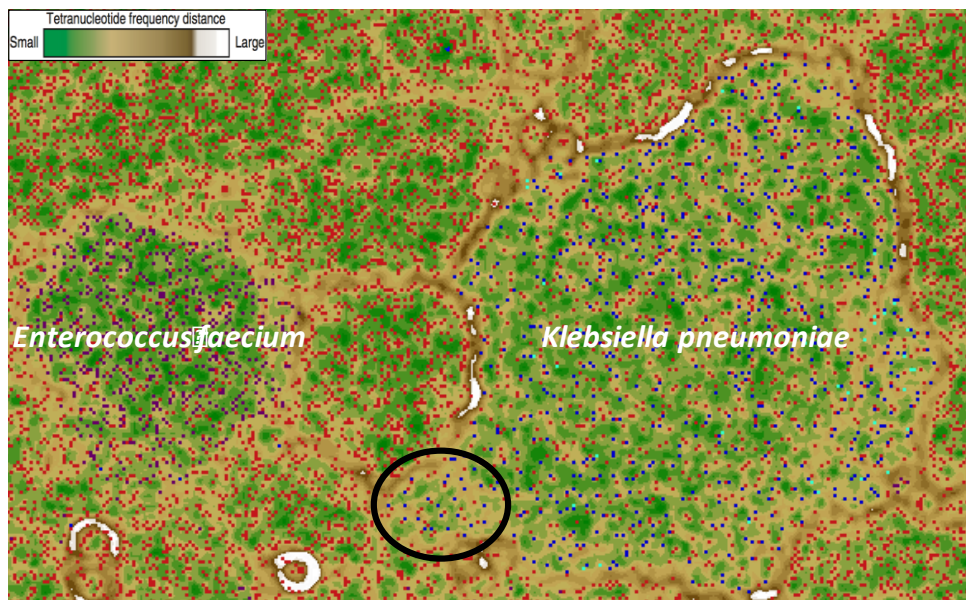

466 **Figure 1. (A) Emergent Self Organizing Map of the tetranucleotide frequencies of**  
467 **AUSMDU00008155 contigs in binned genomes representing (B) *Klebsiella pneumoniae* and**  
468 ***Enterococcus faecium*. Tetranucleotide frequency profiles of DNA fragments between 2 kb to**  
469 **5 kb in length are projected onto the ESOM. A green background indicates small**  
470 **tetranucleotide frequency distances, white background represents large tetranucleotide**  
471 **frequency distances, while contigs derived from AUSMDU00008155 microbiome is**  
472 **highlighted in red, AUSMDU00008118 in teal, AUSMDU00008119 in navy, and a *vanB*-carrying**  
473 ***E. faecium* in purple.**

474 **Fig. 2**

475

476

477

478

479

480

481

482

483

484

485

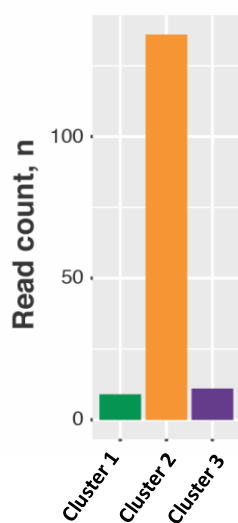

486 **Figure 2: Metagenomic attribution of transmission clusters.** The bar graph shows the  
487 number of metagenomic reads assigned to each of the reference genomes, representing  
488 different transmission clusters described in Kwong *et al.*, (*in prep*).
